# Supplementary material for: Nei Endonuclease VIII‐Like1 (NEIL1) Inhibits Apoptosis of Human Colorectal Cancer Cells
Source: Hindawi journal article supplement (doi:10.1155/2020/5053975), 2020-01-01
Supplement: f1 [file 5053975.f1.pdf]

1 **Nei-endonuclease VIII-like1 (NEIL1) inhibits apoptosis of human colorectal**  
2 **cancer cells**

3 Wanjuan Xue<sup>1, #</sup>, Yongcheng Liu<sup>2, #</sup>, Ningning Xin<sup>2, #</sup>, Jiyu Miao<sup>4</sup>, Juan Du<sup>4</sup>, Yu Wang<sup>4</sup>,  
4 Haiyan Shi<sup>1</sup>, Yameng Wei<sup>1</sup>, Huahua Zhang<sup>1</sup>, Yani Chen<sup>1</sup>, Yi Gao<sup>1</sup>, Dan Li<sup>1</sup>, Yun Feng<sup>1</sup>,  
5 Jing Yan<sup>1</sup>, Jing Zhang<sup>1</sup>, Ni Hou<sup>4</sup>, Chen Huang<sup>4, \*</sup>, Jiming Han<sup>1, \*</sup>

6 <sup>1</sup>Department of Cell Biology and Genetics, Medical College of Yan'an University,  
7 Yan'an 716000, Shaanxi, China;

8 <sup>2</sup>Department of Pathology, Yan'an University Affiliated Hospital, Yan'an 716000,  
9 Shaanxi, China;

10 <sup>3</sup>School infirmary, XianYang Normal University, Xianyang 712000, Shaanxi, China;

11 <sup>4</sup>Department of Cell Biology and Genetics, School of Basic Medical Sciences, Xi'an-  
12 Jiaotong University Health Science Center, Xi'an 710061, Shaanxi, China.

13 **#These authors contributed equally to this work.**

14 **Corresponding authors:-**

15 **Chen Huang**, Department of Cell Biology and Genetics, School of Basic Medical  
16 Sciences, Xi'an Jiaotong University Health Science Center, No. 76, Yanta Road, Xi'an  
17 710061, Shaanxi, China. Tel: 86-029-8265 7723. E-mail: hchen@mail.xjtu.edu.cn

18 **Jiming Han**, Department of Clinical Medicine, Medical College of Yan'an University,  
19 No. 38, Guanghua Road, Yan'an 716000, Shaanxi, China. Tel: 86-911-2412-444.  
20 Email: yadxsei@163.com

21 **Running title:** Effects of NEIL1 on human CRC

22 **Abbreviations:** CRC = human colorectal cancer; NEIL1 = Nei endonuclease VIII-  
23 like1; miRNAs = microRNAs; 3'-UTR = 3'-untranslated region-

24

25 Suppl Figure 1

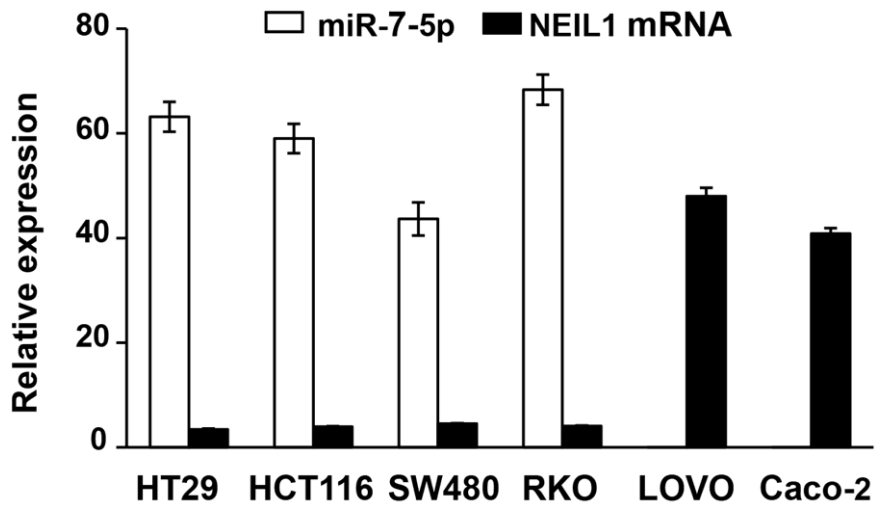

26
